# Supplementary material for: The Burden of Respiratory Disease from Formaldehyde, Damp and Mould in English Housing
Source: MDPI journal article supplement (doi:10.3390/environments10080136), 2023-08-02
Supplement: s1 [file s1]

Archive with 1 entries (1 files):
- environments-2420383-supplementary.pdf
